# Supplementary material for: Gene Expression Profiles of Human Mesenchymal Stromal Cells Derived from Wharton’s Jelly and Amniotic Membrane before and after Osteo-Induction Using NanoString Platform
Source: MDPI journal article supplement (doi:10.3390/cimb44090291), 2022-09-14
Supplement: s1 [file s1]

Gene expression profiles of human mesenchymal stromal cells derived from Wharton's jelly and amniotic membrane before and after osteo-induction using NanoString platform

Vun Vun Hiew, Haselamirrah Mohd Akhir, Peik Lin Teoh\*

Biotechnology Research Institute, Universiti Malaysia Sabah, Jalan UMS, 88400 Kota Kinabalu, Sabah, Malaysia

\*Corresponding author: peiklin@ums.edu.my

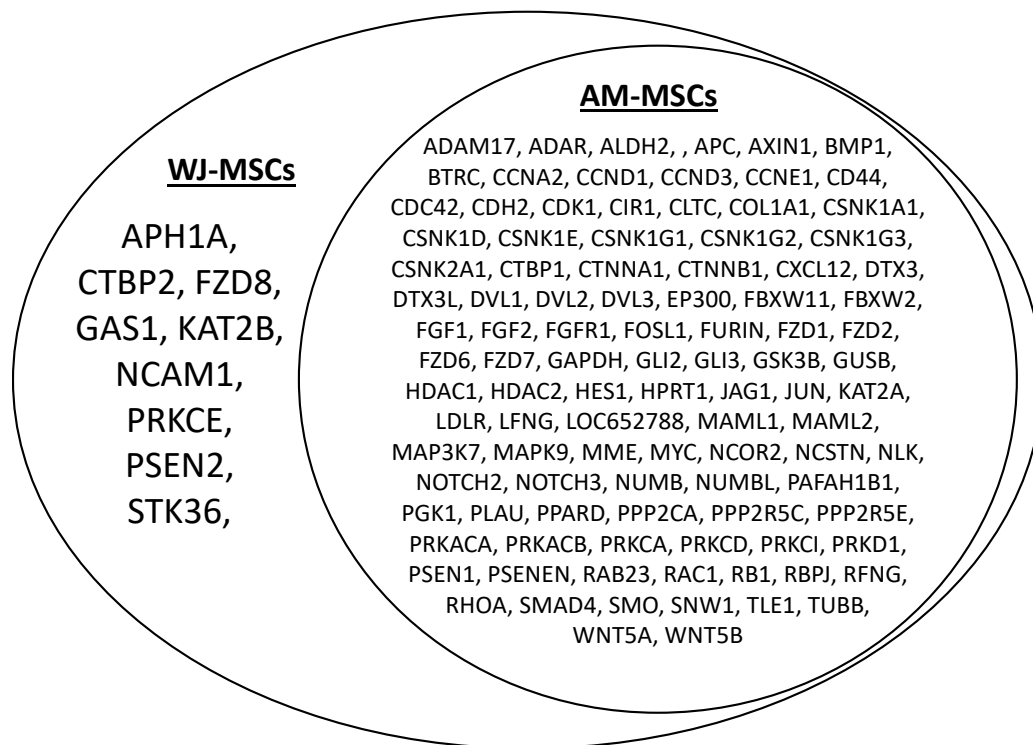

Figure S1. Genes detected in AM- and WJ-MSCs under basal condition.

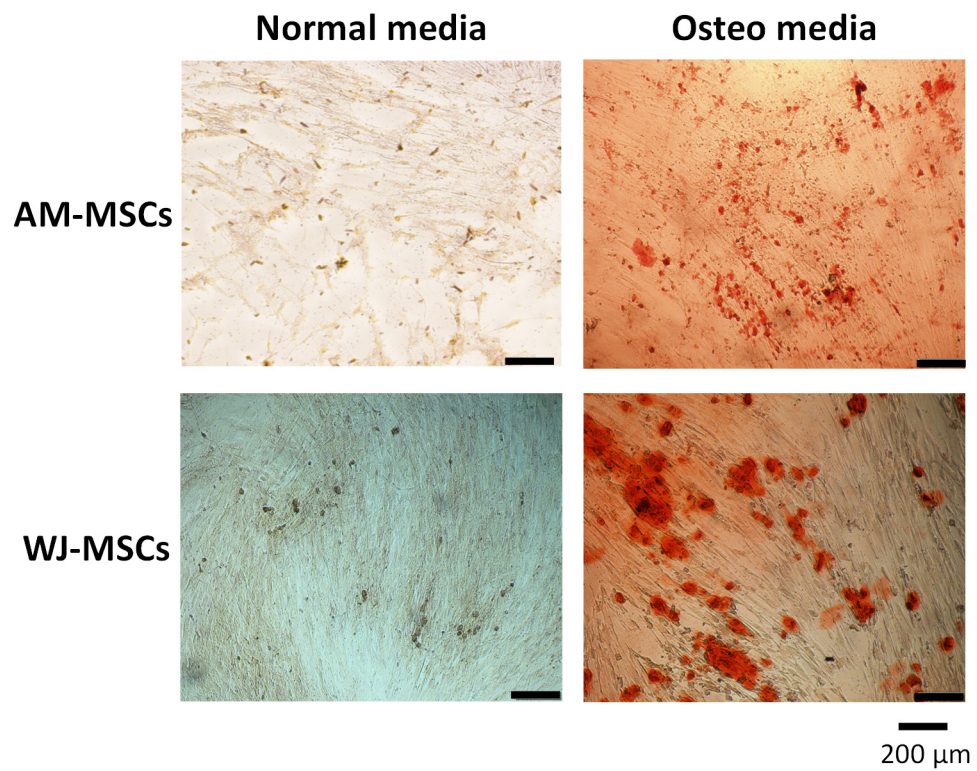

Figure S2. Osteogenic differentiation of the isolated AM- and WJ-MSCs. AM- and WJ-MSCs were stained with Alizarin Red. Scale bar = 200  $\mu$ m.

Table S1. Fold change of genes upregulated and downregulated upon osteo-induction in AM- and WJ-MSCs.

| AM-MSCs     |       |               |      | WJ-MSCs     |       |               |       |
|-------------|-------|---------------|------|-------------|-------|---------------|-------|
| Upregulated |       | Downregulated |      | Upregulated |       | Downregulated |       |
| ADAM17      | 2.25  | HES1          | 1.52 | CD44        | -1.19 | ADAM17        | 1.03  |
| ADAR        | 2.15  | HPRT1         | 1.08 | CDH2        | -1.81 | PGK1          | 1.57  |
| ALDH1A1     | 6.50  | IGF1          | 7.55 | CDK1        | -1.32 | ALDH1A1       | 78.28 |
| ALDH2       | 2.68  | JUN           | 2.02 | COL1A1      | -1.24 | PPARG         | 2.30  |
| APC         | 2.85  | KAT2A         | 1.79 | CXCL12      | -3.04 | PPP2R5C       | 1.35  |
| AXIN1       | 2.32  | KAT2B         | 2.05 | DVL1        | -1.18 | PPP2R5E       | 1.09  |
| BMP1        | 1.74  | LDLR          | 1.40 | FGF1        | -3.47 | PRKACB        | 1.07  |
| BTRC        | 1.73  | LOC652788     | 1.04 | FGF2        | -1.06 | PRKCA         | 1.59  |
| CCNA2       | 1.54  | MAML1         | 2.17 | FZD7        | -1.17 | PRKCI         | 1.10  |
| CCND1       | 2.00  | MAML2         | 1.49 | GUSB        | -1.02 | PRKD1         | 2.09  |
| CCND2       | 8.47  | MAP3K7        | 1.32 | ISL1        | -1.15 | PSEN1         | 1.77  |
| CCND3       | 4.73  | MAPK9         | 1.38 | JAG1        | -1.01 | PSEN2         | 1.29  |
| CCNE1       | 1.84  | MME           | 2.46 | KRT15       | -7.41 | PSENEN        | 1.22  |
| CDC42       | 1.69  | MYC           | 3.60 | LFNG        | -4.78 | RB1           | 1.30  |
| CIR1        | 1.50  | NCOR2         | 1.26 | NCAM1       | -1.78 | RBPJ          | 1.79  |
| CREBBP      | 3.66  | NCSTN         | 1.22 | NOTCH3      | -1.66 | RFNG          | 1.26  |
| CSNK1A1     | 1.28  | NLK           | 1.95 | RAB23       | -5.46 | SMAD4         | 1.30  |
| CSNK1D      | 1.51  | NOTCH2        | 1.09 | RFNG        | -1.17 | STK36         | 1.20  |
| CSNK1E      | 1.28  | NUMB          | 1.62 | WNT5B       | -1.22 | TLE1          | 1.58  |
| CSNK1G1     | 2.29  | NUMBL         | 1.12 | CTNNB1      | 1.22  | WNT2B         | 2.25  |
| CSNK1G2     | 1.95  | PAFAH1B1      | 1.85 | DTX4        | 4.80  | WNT5A         | 3.40  |
| CSNK1G3     | 1.98  | PGK1          | 1.03 | DVL2        | 1.10  | WNT5B         | 1.28  |
| CSNK2A1     | 1.48  | PLAU          | 1.48 | DVL3        | 1.53  |               |       |
| CTBP1       | 1.97  | PPARD         | 1.42 | EP300       | 1.28  |               |       |
| CTBP2       | 1.98  | PPARG         | 4.12 | FBXW11      | 1.39  |               |       |
| CTNNA1      | 1.14  | PPP2CA        | 2.37 | FBXW2       | 2.05  |               |       |
| CTNNB1      | 2.22  | PPP2R5C       | 1.71 | FGFR1       | 1.40  |               |       |
| DLL3        | 1.42  | PPP2R5E       | 1.65 | FURIN       | 1.44  |               |       |
| DLL4        | 4.74  | PRKACA        | 1.19 | FZD1        | 2.40  |               |       |
| DTX3        | 1.45  | PRKACB        | 1.20 | FZD2        | 1.36  |               |       |
| DTX3L       | 4.29  | PRKCA         | 1.02 | FZD6        | 1.59  |               |       |
| DTX4        | 2.66  | PRKCD         | 1.05 | GAS1        | 6.56  |               |       |
| DVL2        | 1.69  | PRKCE         | 1.96 | GSK3B       | 1.66  |               |       |
| DVL3        | 1.57  | PRKCI         | 1.05 | HDAC1       | 1.29  |               |       |
| EP300       | 2.73  | PRKD1         | 2.25 | IGF1        | 2.08  |               |       |
| FBXW11      | 1.67  | PSEN1         | 2.13 | KAT2B       | 2.13  |               |       |
| FBXW2       | 1.83  | PSEN2         | 2.27 | LDLR        | 1.76  |               |       |
| FGFR1       | 1.45  | PSENEN        | 2.11 | LOC652788   | 1.03  |               |       |
| FOSL1       | 1.58  | RAC1          | 1.50 | MAML1       | 1.09  |               |       |
| FURIN       | 1.17  | RB1           | 1.79 | MAML2       | 1.67  |               |       |
| FZD1        | 2.96  | RBPJ          | 1.28 | MAP3K7      | 1.18  |               |       |
| FZD2        | 1.68  | RHOA          | 1.08 | MAPK9       | 1.24  |               |       |
| FZD6        | 1.72  | SMAD4         | 1.74 | MME         | 9.14  |               |       |
| FZD8        | 6.48  | SMO           | 1.09 | NCOR2       | 1.59  |               |       |
| GAS1        | 16.34 | SNW1          | 2.00 | NCSTN       | 1.17  |               |       |
| GLI2        | 1.65  | STK36         | 1.34 | NLK         | 1.03  |               |       |
| GLI3        | 1.55  | TLE1          | 2.92 | NOTCH3      | 2.06  |               |       |
| GSK3B       | 1.90  | WNT2B         | 1.09 | NUMB        | 1.11  |               |       |
| HDAC1       | 1.44  | WNT5A         | 2.94 | NUMBL       | 1.29  |               |       |
| HDAC2       | 1.68  |               |      | PAFAH1B1    | 1.08  |               |       |
